# Supplementary material
Source: Research Square preprint supplement (doi:10.21203/rs.3.rs-10045122/v1)
Supplement: Supplementary file 1 [file ee1dc14d3c09238e39645392.docx]

**Supplemental Material**

**Table S1**. Polymers quantified in the muscle tissue of dolphinfish and yellowfin tuna using the Py-GC qQq-MS approach: acrylonitrile butadiene styrene (ABS), nylon-66 (N66), nylon-6 (PA), polycarbonate (PC), polyethylene (PE), polyethylene terephthalate (PET), polymethyl methacrylate (PMMA), polypropylene (PP), polystyrene (PS), polyurethane (PUR) and polyvinyl chloride (PVC). Concentrations (μg g-1 DW) displayed as means per species and ocean basin. Overall percent frequency of occurrence across all individuals assayed also shown.

**Table S2.** Mean d15NAA values by region for source (Gly = Glycine, Lys = Lysine, Phe = Phenylalanine) and trophic (Ala = Alanine, Glx = Glutamic acid, Leu = Leucine) amino acids by region that were used to estimate trophic position of dolphinfish and yellowfin tuna. Trophic position (TP) derived using δ15NAA weighted means of select source and trophic amino acids (denoted TP).
